# Supplementary material
Source: Springer Nature journal article supplement (https://www.springermedizin.de/resource/supplementary/13063_2013_1851_MOESM1_ESM.pdf/9620356)

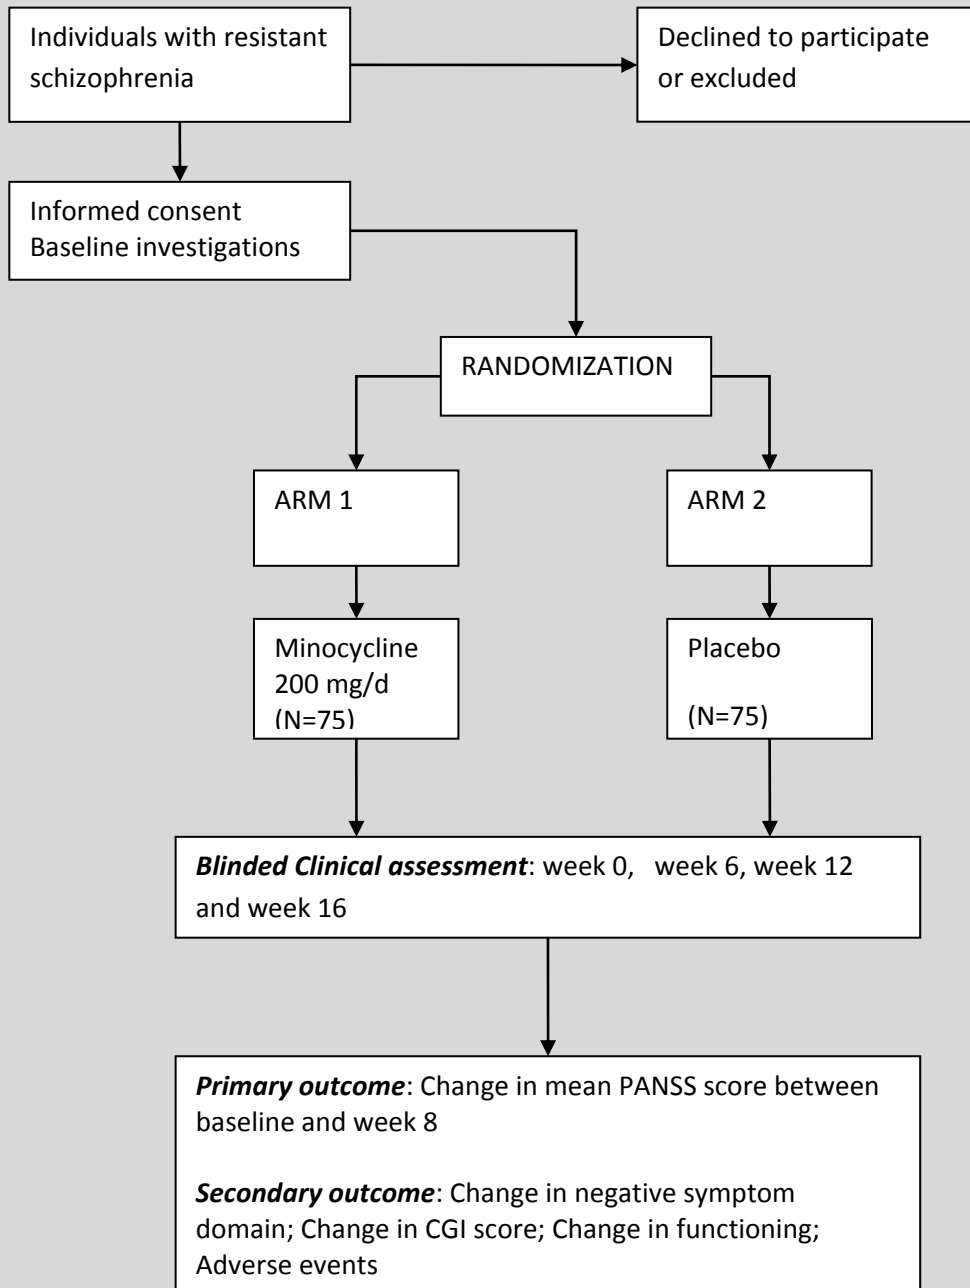

Supplement: MOESM1 [file 9620356]
